# Supplementary material
Source: publisher figshare collection journal article supplement (https://gsapubs.figshare.com/articles/dataset/_/14593746)
Supplement: Supplementary file 1 [file 1]

## **TECTONIC EVOLUTION OF THE CENTRAL CALIFORNIA MARGIN AS REFLECTED BY DETRITAL ZIRCON COMPOSITION IN THE MOUNT DIABLO REGION**

Jared T. Gooley, Marty Grove, and Stephan A. Graham

### **Supplementary Materials**

#### *Summary of Contents*

Appendix S1: Geologic Map Data Sources

Appendix S2: Sample Preparation and Analytical Methods

Table S1: U-Th-Pb Isotopic Composition of Detrital Zircon Analyzed at the University of  
Arizona LaserChron Center

Table S2: Relative Abundance of Dominant U-Pb Age Components

## Appendix S1: Geologic Map Data Sources

The geologic map of the Mount Diablo region in Figure 1B was assembled by stitching and digitizing 23 maps at 1:24,000 scale (Dibblee and Minch; 2005a–m, 2006a–i). Additionally, the 1:75,000 scale map of Graymer et al. (1994) was used to crosscheck map units and complete missing areas. References are found below.

### REFERENCES

- Dibblee, T.W., and Minch, J.A., 2005a, Geologic map of the Benicia quadrangle, Contra Costa & Solano Counties, California: Dibblee Geological Foundation, Dibblee Foundation Map DF-146, scale 1:24,000.
- Dibblee, T.W., and Minch, J.A., 2005b, Geologic map of the Briones Valley quadrangle, Contra Costa & Alameda Counties, California: Dibblee Geological Foundation, Dibblee Foundation Map DF-148, scale 1:24,000.
- Dibblee, T.W., and Minch, J.A., 2005c, Geologic map of the Diablo quadrangle, Contra Costa and Alameda Counties, California: Dibblee Geological Foundation, Dibblee Foundation Map DF-162, scale 1:24,000.
- Dibblee, T.W., and Minch, J.A., 2005d, Geologic map of the Dublin quadrangle, Contra Costa and Alameda Counties, California: Dibblee Geological Foundation, Dibblee Foundation Map DF-164, scale 1:24,000.
- Dibblee, T.W., and Minch, J.A., 2005e, Geologic map of the Hayward quadrangle, Contra Costa and Alameda Counties, California: Dibblee Geological Foundation, Dibblee Foundation Map DF-163, scale 1:24,000.
- Dibblee, T.W., and Minch, J.A., 2005f, Geologic map of the La Costa Valley quadrangle, Alameda County, California: Dibblee Geological Foundation, Dibblee Foundation Map DF-152, scale 1:24,000.
- Dibblee, T.W., and Minch, J.A., 2005g, Geologic map of the Las Trampas Ridge quadrangle, Contra Costa and Alameda Counties, California: Dibblee Geological Foundation, Dibblee Foundation Map DF-161, scale 1:24,000.
- Dibblee, T.W., and Minch, J.A., 2005h, Geologic map of the Mare Island quadrangle, Contra Costa, Solano, Marin, & Sonoma Counties, California: Dibblee Geological Foundation, Dibblee Foundation Map DF-145, scale 1:24,000.
- Dibblee, T.W., and Minch, J.A., 2005i, Geologic map of the Newark quadrangle, Alameda County, California: Dibblee Geological Foundation, Dibblee Foundation Map DF-150, scale 1:24,000.
- Dibblee, T.W., and Minch, J.A., 2005j, Geologic map of the Niles quadrangle, Alameda County, California: Dibblee Geological Foundation, Dibblee Foundation Map DF-151, scale 1:24,000.

- Dibblee, T.W., and Minch, J.A., 2005k, Geologic map of the Oakland East quadrangle, Contra Costa and Alameda Counties, California: Dibblee Geological Foundation, Dibblee Foundation Map DF-160, scale 1:24,000.
- Dibblee, T.W., and Minch, J.A., 2005l, Geologic map of the Richmond quadrangle, Contra Costa & Alameda Counties, California: Dibblee Geological Foundation, Dibblee Foundation Map DF-147, scale 1:24,000.
- Dibblee, T.W., and Minch, J.A., 2005m, Geologic map of the Walnut Creek quadrangle, Contra Costa County, California: Dibblee Geological Foundation, Dibblee Foundation Map DF-149, scale 1:24,000.
- Dibblee, T.W., and Minch, J.A., 2006a, Geologic map of the Altamont quadrangle, Alameda County, California: Dibblee Geological Foundation, Dibblee Foundation Map DF-197, scale 1:24,000.
- Dibblee, T.W., and Minch, J.A., 2006b, Geologic map of the Antioch South & Brentwood quadrangles, Contra Costa County, California: Dibblee Geological Foundation, Dibblee Foundation Map DF-193, scale 1:24,000.
- Dibblee, T.W., and Minch, J.A., 2006c, Geologic map of the Byron Hot Springs & Clifton Court Forebay quadrangles, Contra Costa, Alameda, & San Joaquin Counties, California: Dibblee Geological Foundation, Dibblee Foundation Map DF-195, scale 1:24,000.
- Dibblee, T.W., and Minch, J.A., 2006d, Geologic map of the Cedar Mountain quadrangle, Alameda & San Joaquin Counties, California: Dibblee Geological Foundation, Dibblee Foundation Map DF-241, scale 1:24,000.
- Dibblee, T.W., and Minch, J.A., 2006e, Geologic map of the Livermore quadrangle, Contra Costa & Alameda Counties, California: Dibblee Geological Foundation, Dibblee Foundation Map DF-196, scale 1:24,000.
- Dibblee, T.W., and Minch, J.A., 2006e, Geologic map of the Lone Tree Creek quadrangle, Alameda, San Joaquin, and Stanislaus Counties, California: Dibblee Geological Foundation, Dibblee Foundation Map DF-242, scale 1:24,000.
- Dibblee, T.W., and Minch, J.A., 2006f, Geologic map of the Mendenhall Springs quadrangle, Alameda County, California: Dibblee Geological Foundation, Dibblee Foundation Map DF-235, scale 1:24,000.
- Dibblee, T.W., and Minch, J.A., 2006g, Geologic map of the Midway & Tracy quadrangles, Alameda & San Joaquin Counties, California: Dibblee Geological Foundation, Dibblee Foundation Map DF-243, scale 1:24,000.
- Dibblee, T.W., and Minch, J.A., 2006h, Geologic map of the Tassajara quadrangle, Contra Costa & Alameda Counties, California: Dibblee Geological Foundation, Dibblee Foundation Map DF-194, scale 1:24,000.
- Dibblee, T.W., and Minch, J.A., 2006i, Geologic map of the Vine Hill & Honker Bay quadrangles, Contra Costa & Solano Counties, California: Dibblee Geological Foundation, Dibblee Foundation Map DF-191, scale 1:24,000.

Graymer, R.W., Jones, D.L., and Brabb, E.E., 1994, Preliminary geologic map emphasizing bedrock formations in Alameda County, California: a digital database: U.S. Geological Survey Open-file Report OF-96-252

## **Appendix S2: Sample Preparation and Analytical Methods**

### **Mineral Separation for Detrital Zircon Analysis (Stanford University Earth Materials Lab)**

Rock samples were crushed and disaggregated using a Bico-Braun chipmunk jaw crusher and Bico-Braun disk grinder. Disaggregated samples were individually hydrodynamically processed on a Gemini table to concentrate heavy sand fractions. Heavy sand fractions were rinsed in acetone to prevent grains from rusting and then were oven-dried. Less magnetic minerals were concentrated using a sloped Frantz magnetic separator set at a 10° incline and 100 volts at 0.4 angstroms (Å), 0.8 Å, and 1.2 Å. Separates were then run through methylene iodide (MEI) heavy liquid ( $\rho=3.32 \text{ g/cm}^3$ ) to collect the final nonmagnetic heavy fraction. Sample separates were sent to the University of Arizona LaserChron center to be mounted individually in a 2.54 cm (1 inch) epoxy mount with fragments of primary (FC-Z5, 1099 Ma; Paces and Miller, 1993), Sri Lanka (SL-Mix and SL-F; 563.5 Ma; Gehrels et al., 2008) and secondary (R33, 419 Ma; Black et al., 2004) standard zircons. Mounts were polished to half of mean grain thickness (~20  $\mu\text{m}$ ) for imaging with a back-scattered electron (BSE) detector, using a Hitachi 3400N scanning electron microscope (SEM). The mounts were then polished to expose the zircon grain cores (1500 grit wet/dry sandpaper, followed by 6  $\mu\text{m}$ , then 1  $\mu\text{m}$  diamond powder slurries) on a Struers LabPol5 rotary polisher, and coated with roughly 10 nm high-purity gold in a Denton sputter coater before analysis.

### **U-Pb Geochronology Analysis by LA-ICP-MS (University of Arizona LaserChron Center)**

U-Pb geochronology of zircons was conducted by laser ablation multicollector inductively coupled plasma mass spectrometry (LA-MC-ICPMS) at the Arizona LaserChron Center (Gehrels et al., 2006, 2008). The analyses involve ablation of zircon with a Photon Machines Analyte G2 excimer laser using a spot diameter of 30 microns. The ablated material is carried in helium into the plasma source of a Nu HR ICPMS, which is equipped with a flight tube of sufficient width that U, Th, and Pb isotopes are measured simultaneously. All measurements are made in static mode, using Faraday detectors with  $3 \times 10^{11} \text{ ohm}$  resistors for  $^{238}\text{U}$ ,  $^{232}\text{Th}$ ,  $^{208}\text{Pb}$ - $^{206}\text{Pb}$ , and discrete dynode ion counters for  $^{204}\text{Pb}$  and  $^{202}\text{Hg}$ . Ion yields are ~0.8 mv per ppm. Each analysis consists of one 15-second integration on peaks with the laser off (for backgrounds), 15 one-second

integrations with the laser firing, and a 30 second delay to purge the previous sample and prepare for the next analysis. The ablation pit is ~15 microns in depth.

For each analysis, the errors in determining  $^{206}\text{Pb}/^{238}\text{U}$  and  $^{206}\text{Pb}/^{204}\text{Pb}$  result in a measurement error of ~1-2% (at 2-sigma level) in the  $^{206}\text{Pb}/^{238}\text{U}$  age. The errors in measurement of  $^{206}\text{Pb}/^{207}\text{Pb}$  and  $^{206}\text{Pb}/^{204}\text{Pb}$  also result in ~1-2% (at 2-sigma level) uncertainty in age for grains that are >1.0 Ga, but are substantially larger for younger grains due to low intensity of the  $^{207}\text{Pb}$  signal. For most analyses, the cross-over in precision of  $^{206}\text{Pb}/^{238}\text{U}$  and  $^{206}\text{Pb}/^{207}\text{Pb}$  ages occurs at ~1.0 Ga. Instrument setup, tuning, run parameters, standard-unknown bracketing, and data reduction followed that of Gehrels and Pecha (2014).

Common Pb correction is accomplished by using the Hg-corrected  $^{204}\text{Pb}$  and assuming an initial Pb composition from Stacey and Kramers (1975). Uncertainties of 1.5 for  $^{206}\text{Pb}/^{204}\text{Pb}$  and 0.3 for  $^{207}\text{Pb}/^{204}\text{Pb}$  are applied to these compositional values based on the variation in Pb isotopic composition in modern crystal rocks. For each sample, the uncertainty in determining  $^{206}\text{Pb}/^{207}\text{Pb}$  and  $^{206}\text{Pb}/^{238}\text{U}$  ages result in generally 1-2% (2-sigma) for both. Concentrations of U and Th are calibrated relative to our Sri Lanka zircon, which contains ~518 ppm of U and 68 ppm Th.

### **U-Pb Geochronology Data Reduction (University of Arizona LaserChron Center)**

U-Pb geochronology analyses by LA-ICP-MS were reduced at the University of Arizona LaserChron Center following standard methods (after Gehrels et al., 2006, 2008; <https://sites.google.com/a/laserchron.org/laserchron/>). Only grains with <20% discordance and <5% reverse discordance are included in interpretations. Final ages are based on  $^{206}\text{Pb}/^{238}\text{U}$  if younger than 900 Ma, and  $^{207}\text{Pb}/^{206}\text{Pb}$  for ages >900 Ma. Data reduction was performed with an in-house Python decoding routine and a Microsoft *Excel* spreadsheet (*NUagecalc*). Analytical data is available in (Table S1).

### **References**

- Black, L. P., Kamo, S. L., Allen, C. M., Davis, D. W., Aleinikoff, J. N., Valley, J. W., and Foudoulis, C., 2004, Improved  $^{206}\text{Pb}/^{238}\text{U}$  microprobe geochronology by the monitoring of a trace-element related matrix effect; SHRIMP, ID-TIMS, ELA-ICP-MS and oxygen isotope documentation for a series of zircon standards: *Chemical Geology*, v. 205, no. 1, p. 115–140.

- Gehrels, G.E., Valencia, V., Ruiz, J., 2008, Enhanced precision, accuracy, efficiency, and spatial resolution of U-Pb ages by laser ablation–multicollector–inductively coupled plasma–mass spectrometry: *Geochemistry, Geophysics, Geosystems*, v. 9, Q03017, doi:10.1029/2007GC001805.
- Gehrels, G.E., Valencia, V., Pullen, A., 2006, Detrital zircon geochronology by Laser-Ablation Multicollector ICPMS at the Arizona LaserChron Center, in Loszewski, T., and Huff, W., eds., *Geochronology: Emerging Opportunities*, Paleontology Society Short Course: Paleontology Society Papers, v. 11, 10 p.
- Gehrels, G. and Pecha, M., 2014, Detrital zircon U-Pb geochronology and Hf isotope geochemistry of Paleozoic and Triassic passive margin strata of western North America: *Geosphere*, v. 10, no.1, p. 49–65.
- Paces, J.B. and Miller, J.D., 1993, Precise U-Pb ages of Duluth Complex and related mafic intrusions, northeastern Minnesota: Geochronological insights to physical, petrogenetic, paleomagnetic, and tectonomagmatic processes associated with the 1.1 Ga Midcontinent Rift system, *Journal of Geophysical Research*, v. 98(B8), p. 13997–14013.
- Stacey, J.S., and Kramers, J.D., 1975, Approximation of terrestrial lead isotope evolution by a two-stage model: *Earth and Planetary Science Letters*, v. 26, p. 207–221.
